# Supplementary material for: RETRACTED ARTICLE: Epstein–Barr virus-encoded microRNA BART1 induces tumour metastasis by regulating PTEN-dependent pathways in nasopharyngeal carcinoma
Source: Springer Nature journal article supplement (doi:10.1038/ncomms8353), 2015-07-02
Supplement: 41467_2015_BFncomms8353_MOESM1286_ESM.pdf [file 41467_2015_BFncomms8353_MOESM1286_ESM.pdf]

## Supplementary Information

### Supplementary Figures

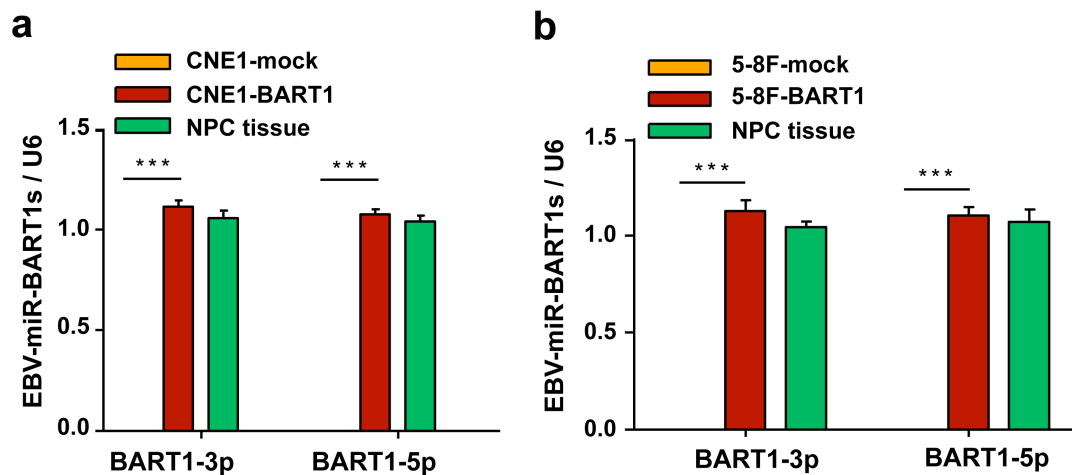

### Supplementary Figure 1. Up-regulation of EBV-miR-BART1 in both CNE1 and 5-8F cells by lentivirus-mediated transduction

Lentiviral particles carrying 282-nt pri-EBV-miR-BART1 precursor (H1-miRNA-CMV-GFP-BART1) or a BART1 control sequence (H1-miRNA-CMV-GFP-mock) was transduced into EBV-negative NPC cell lines. QRT-PCR confirmed the up-regulation of EBV-miR-BART1 in either CNE1-BART1 **(a)** or 5-8F-BART1 **(b)** cells compared with relative mock control cells. The expression level of EBV-miR-BART1 in either CNE1-BART1 or 5-8F-BART1 cells was very close to the mean level of 20 NPC specimens ( $P > 0.05$ ) that used for the miRNA-microarray profile analysis. Student's t test, mean  $\pm$  SEM,  $N=3$ , \*\*\* $P < 0.001$ .

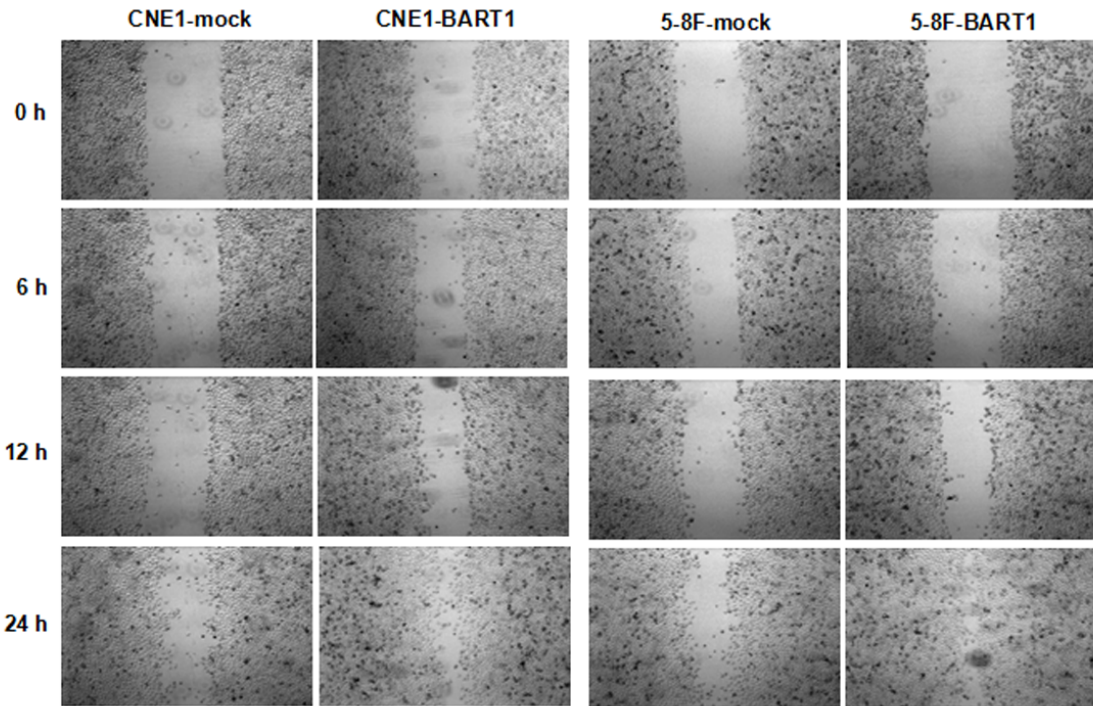

**Supplementary Figure 2. Wound-healing assays evaluating the migration of NPC cells**

Up-regulation of EBV-miR-BART1 increased the migration of both CNE1-BART1 and 5-8F-BART1 cells compared with that of CNE1-mock and 5-8F-mock control cells respectively. Wound-healing pictures were taken at 0, 6, 12, and 24hr after scratch.

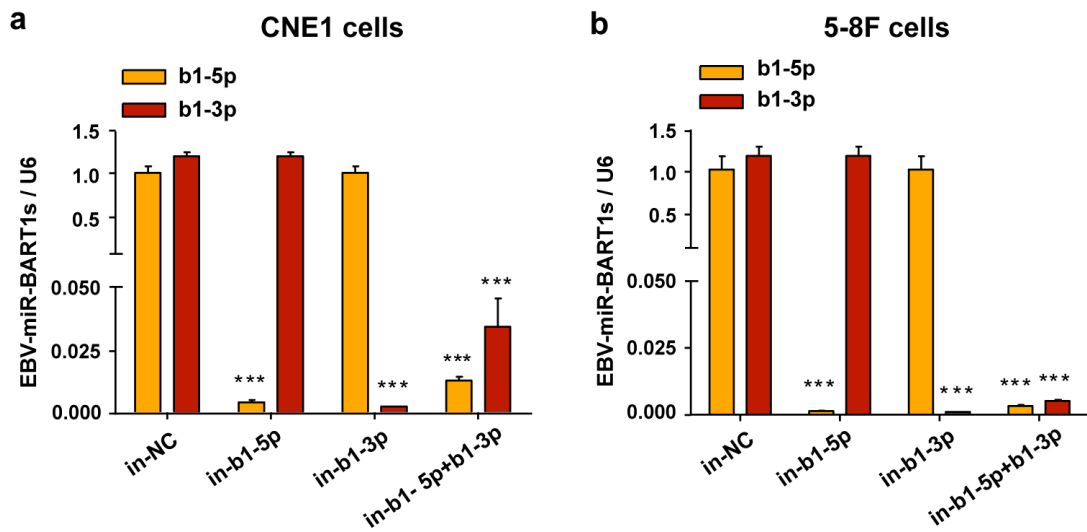

**Supplementary Figure 3. Down-regulation of the expression of EBV-miR-BART1 in both CNE1-BART1 and 5-8F-BART1 cells by transfection of BART1-inhibitory oligonucleotide**

Either CNE1-BART1 cells (a) or 5-8F-BART1 cells (b) was transfected with the BART1-inhibitory oligonucleotide (in-b1-5p for the BART1-5p inhibitor and in-b1-3p for the BART1-3p inhibitor) or the non-specific inhibitor control (in-NC) at 50nM by using Lipofectamine 2000 reagent. The expression of BART1 (either BART1-5p or BART1-3p) was determined by qRT-PCR. Either in-b1-5p or in-b1-3p specifically down-regulated the expression of BART1-5p or BART1-3p respectively. The combination of in-b1-5p and in-b1-3p down-regulated both BART1-5p and BART1-3p. Student's t test, mean  $\pm$  SEM, N=3, \*\*\*P<0.001.

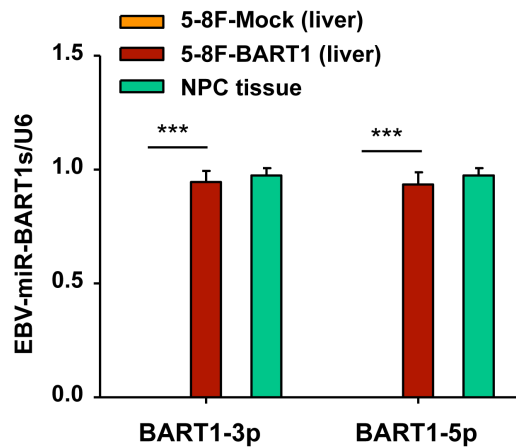

**Supplementary Figure 4. Validation of EBV-miR-BART1 expression in liver-metastasized tumors of mice xenografted with 5-8F NPC cells**

QRT-PCR confirmed the up-regulation of BART1 (either BART1-5p or BART1-3p) in liver-metastasized tumors of mice implanted with 5-8F-BART1 cells compared with that of 5-8F-Mock control. The expression level of either BART1-5p or BART1-3p in liver-metastasized tumors was very close to the mean level of 20 NPC specimens ( $P > 0.05$ ) that used for the miRNA-microarray profile analysis. Student's t test, mean  $\pm$  SEM, N=3, \*\*\* $P < 0.001$ .

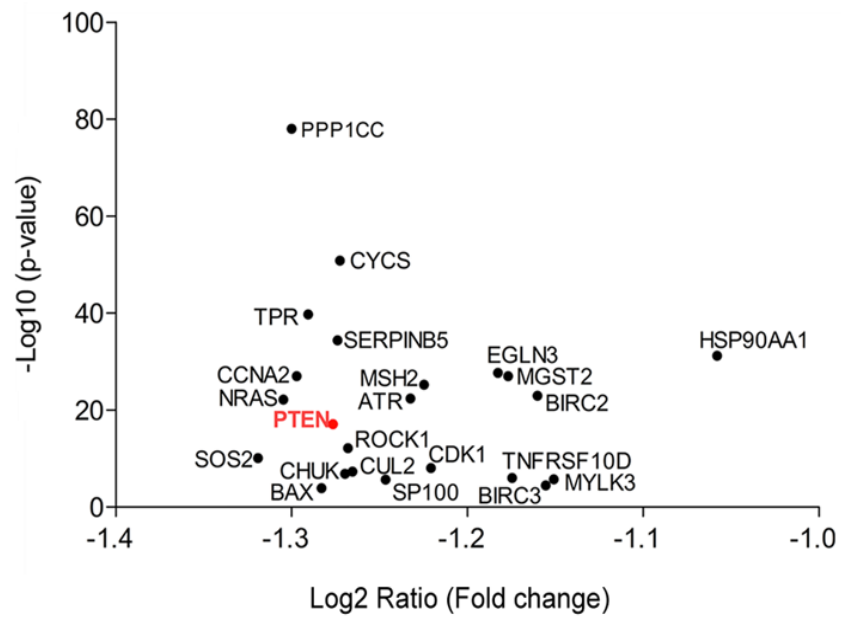

**Supplementary Figure 5. Putative migration/metastasis-associated candidate genes enriched from those EBV-miR-BART1 down-regulated genes obtained from RNA-deep sequencing**

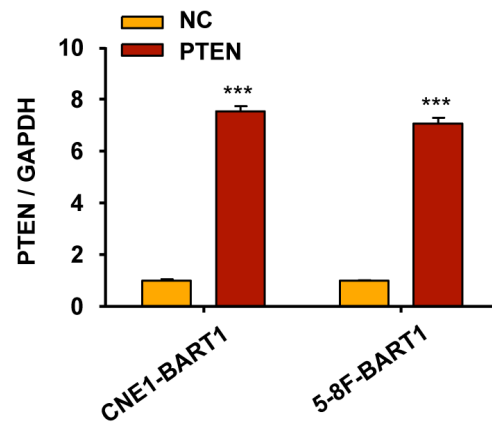

**Supplementary Figure 6. Reconstitution of PTEN expression in CNE1-BART1 and 5-8F-BART1 cells validated by qRT-PCR**

The expression vector GV230 containing whole coding sequence of PTEN and the control vector GV170 (200ng) were transfected into CNE1-BART1 and 5-8F-BART1 cells by using Lipofectamine 2000 reagent. After 48hr, total RNAs were extracted from the transfected cells. QRT-PCR confirmed the restoration of PTEN at mRNA level. Student's t test, mean  $\pm$  SEM, N=3, \*\*\*P<0.001.

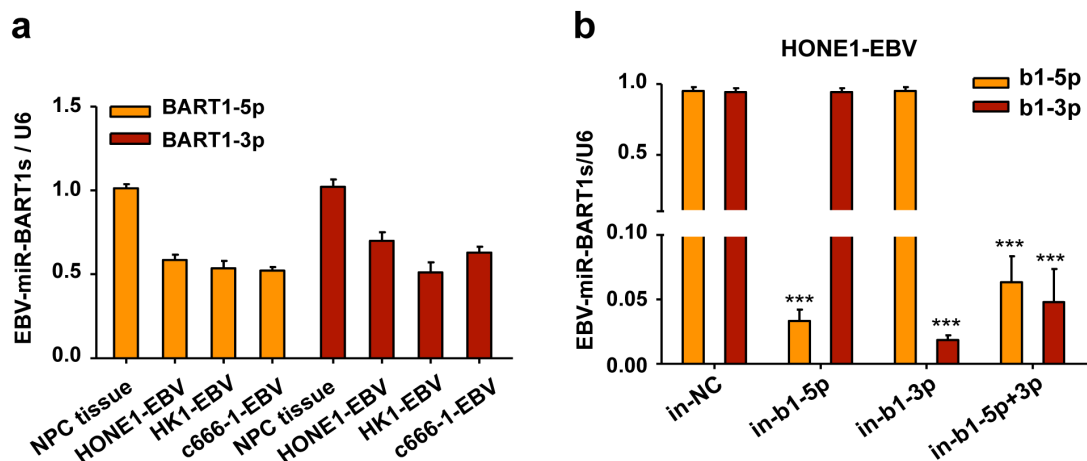

**Supplementary Figure 7. Basal expression of EBV-miR-BART1 in three EBV-positive NPC cell lines and down-regulation of endogenous BART1 expression in HONE1-EBV cells**

**(a)** Expression of BART1 (either BART1-5p or BART1-3p) in three EBV-positive cell lines and 20 NPC clinical samples as quantified by qRT-PCR.

**(b)** Expression of BART1 (either BART1-5p or BART1-3p) was significantly decreased by the BART1 inhibitory oligonucleotides (in-b1-5p, in-b1-3p or both) but not by the control oligonucleotide (in-NC). Mean  $\pm$  SEM, N=3, \*\*\*P < 0.001.

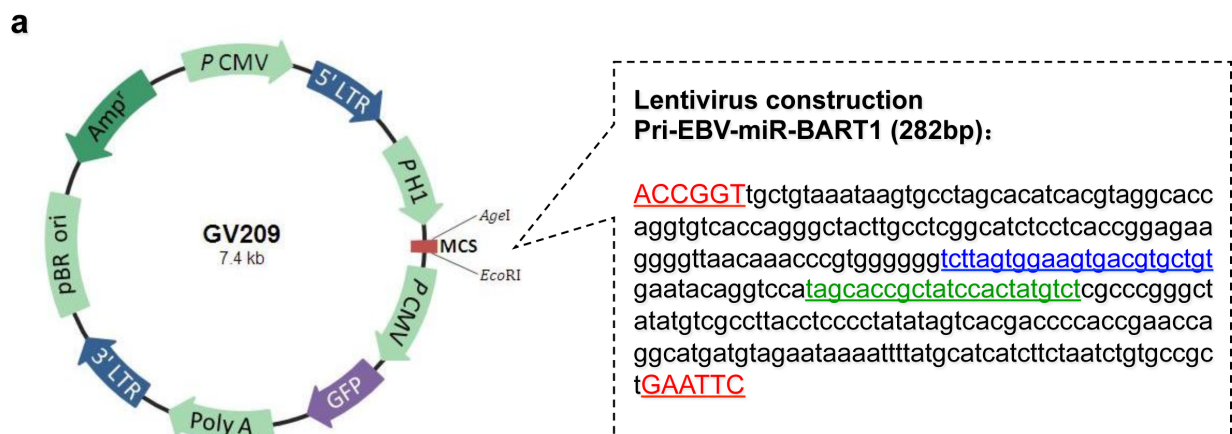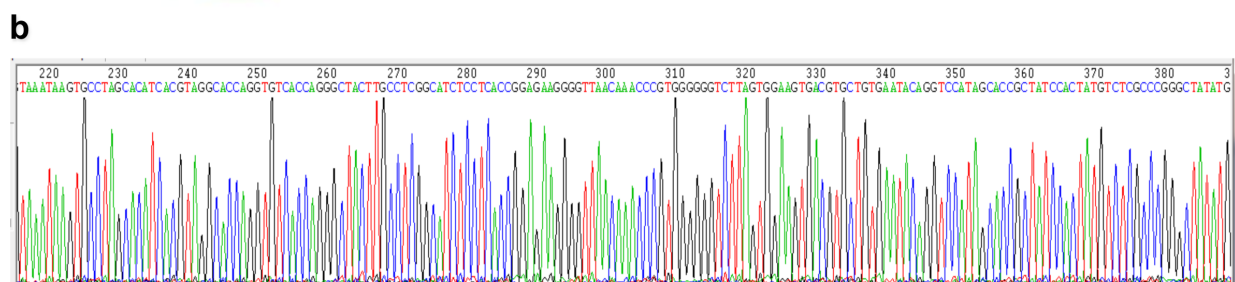

**Supplementary Figure 8. Construction and sequence validation of the lentiviral expression vector used for up-regulation of EBV-miR-BART1**

(a) The GV209 lentiviral vector (H1-miRNA-CMV-EGFP-BART1) containing 282-nt of pri-EBV-miR-BART1 precursor. The BART1-5p and BART1-3p sequences are underlined by blue and green color respectively. *AgeI* (ACCGGT) and *EcoRI* (GAATTC) restriction sites of the insert are capitalized in red color.

(b) Sequence validation of EBV-miR-BART1 by sequencing the insert.



**For Figure 4a CNE1 (Mock BART1)**

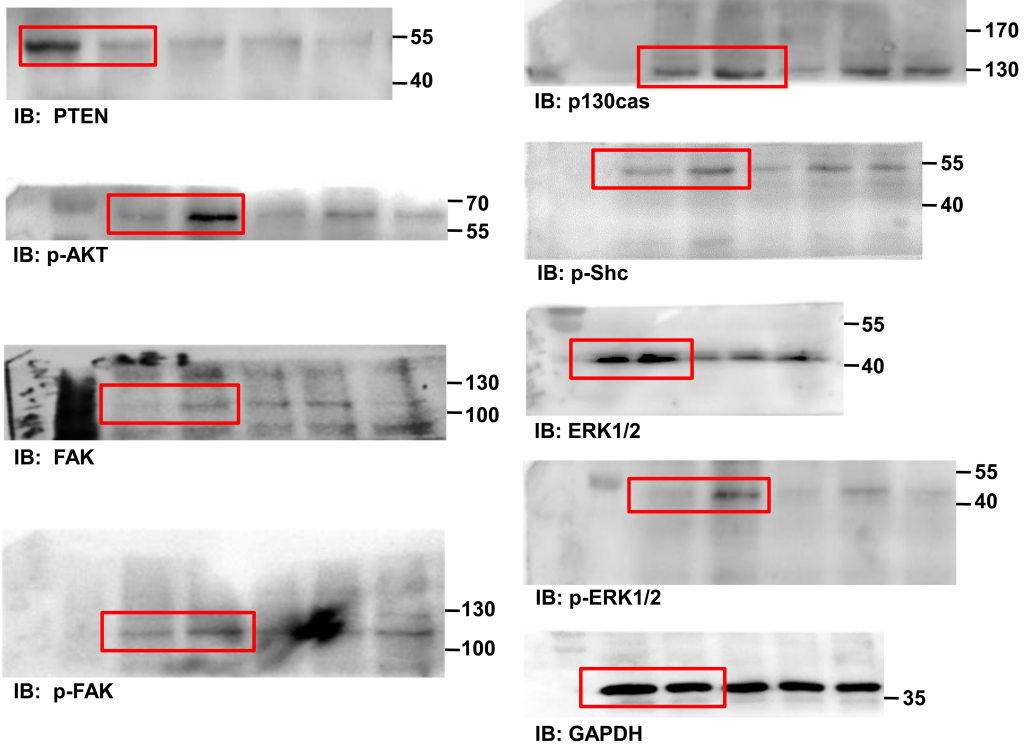

**For Figure 4a 5-8F (Mock BART1)**

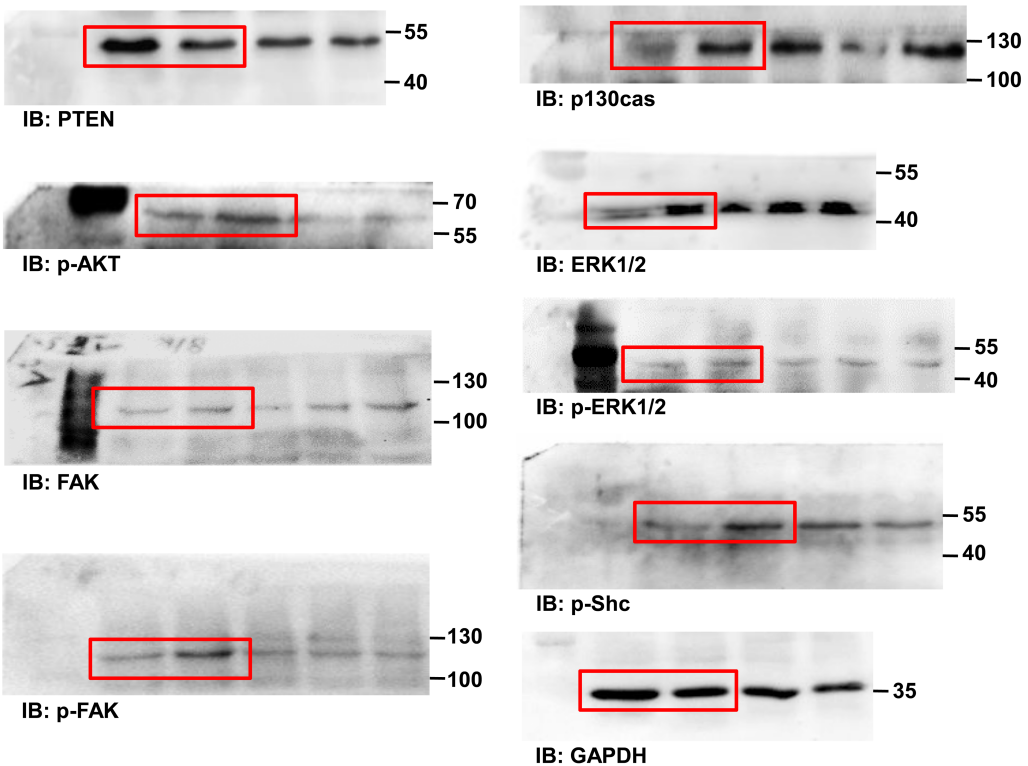

**For Figure 4b CNE1 (inhibition)**

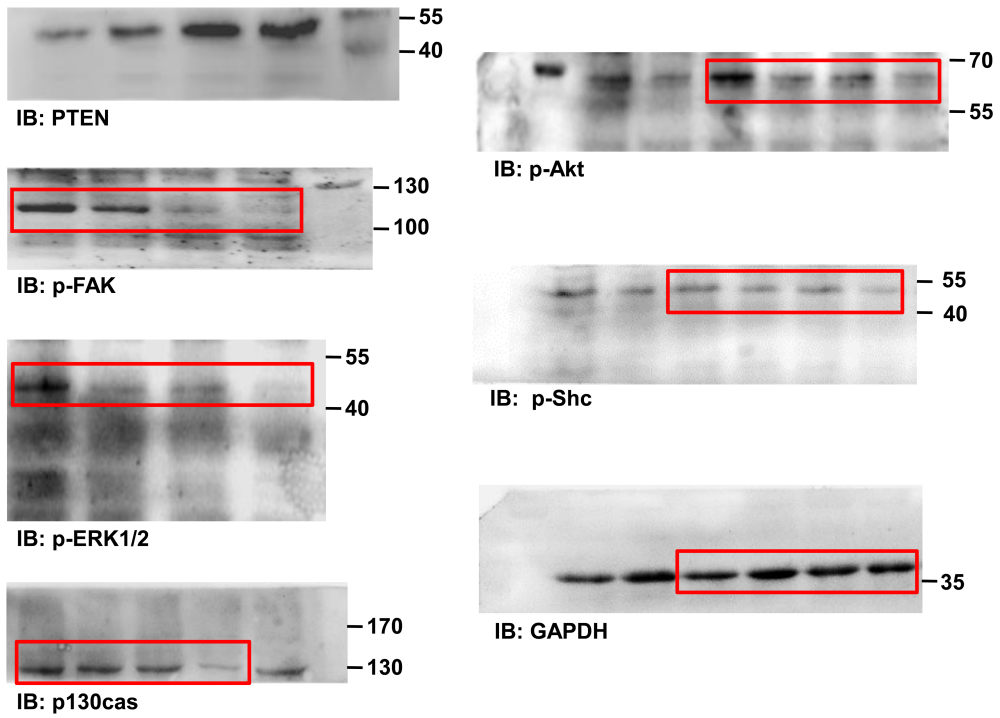

**For Figure 4b 5-8F (inhibition)**

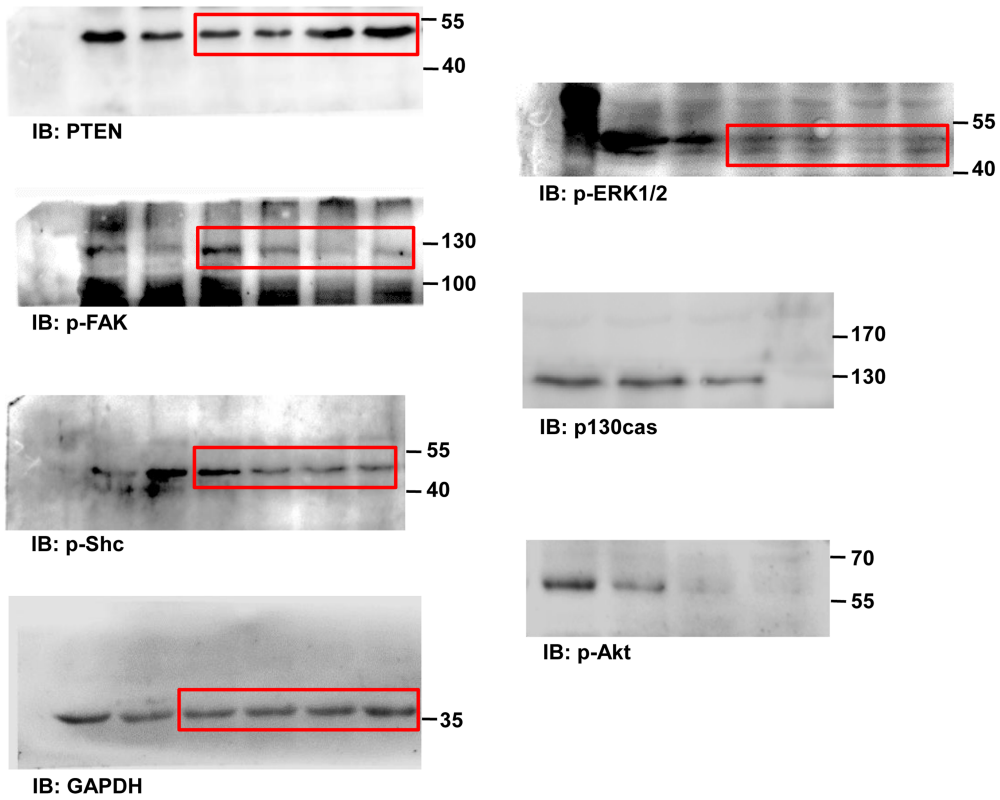

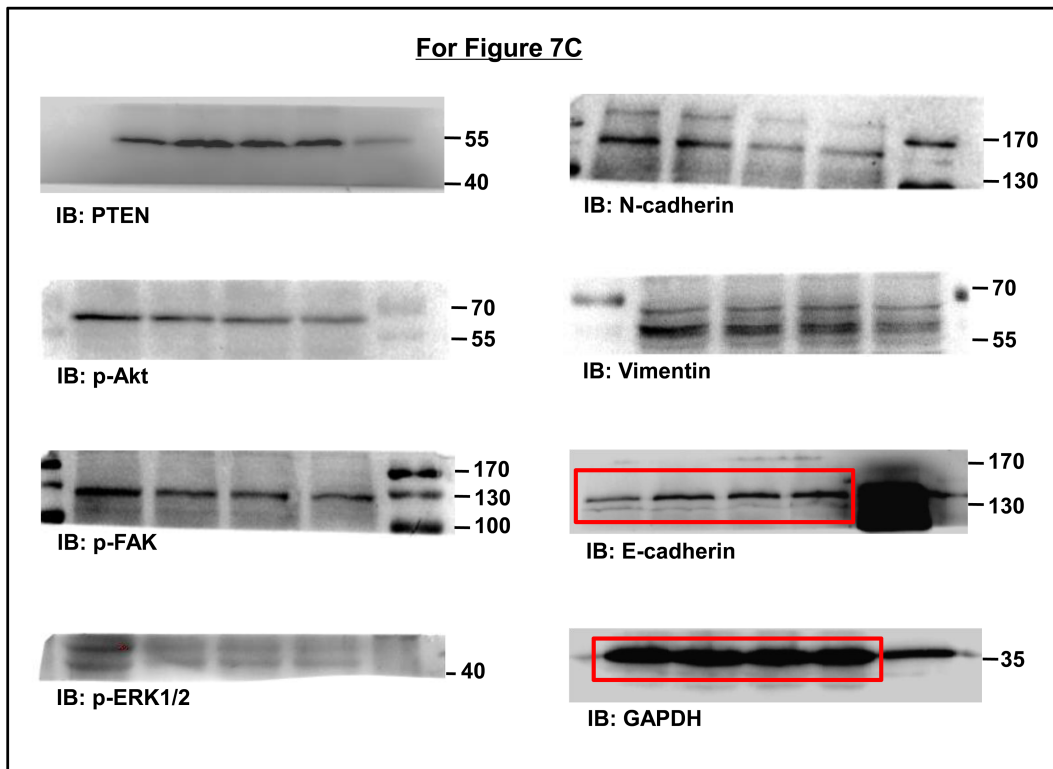

**Supplementary Figure 9. Original Western blotting images of the key components of PTEN-dependent pathway and EMT**

## Supplementary Tables

**Supplementary Table 1.** A cohort of clinical tissue samples for miRNA-microarray analysis and qRT-PCR validation (\*Independent t test; <sup>§</sup>Chi-square test. SCC, squamous cell carcinoma)

| Characteristics           | Clinical tissue samples |            |                   |
|---------------------------|-------------------------|------------|-------------------|
|                           | NP (n=20)               | NPC (n=20) | P-value           |
| Age                       | 40.10                   | 43.35      | 0.45*             |
| Gender, male              | 9 (45%)                 | 14 (70%)   | 0.11 <sup>§</sup> |
| Poorly differentiated SCC |                         | 3 (15%)    |                   |
| Undifferentiated cancer   |                         | 17 (85%)   |                   |
| Differentiated SCC        |                         | 0          |                   |

**Supplementary Table 2.** Identification of 69 miRNAs that are differentially expressed between NPC and NP

| ID of miRNA                    | Fold-change (NPC/NP) | Parametric P-value* | FDR       | Permutation P-value | Geom mean of ratios in NP | Geom mean of ratios in NPC |
|--------------------------------|----------------------|---------------------|-----------|---------------------|---------------------------|----------------------------|
| EBV-mir-BART1                  | 19.27250161          | < 1e-07             | < 1e-07   | < 1e-07             | 0.8125691                 | 15.660236                  |
| EBV-mir-BART7                  | 18.07791945          | < 1e-07             | < 1e-07   | < 1e-07             | 0.9346132                 | 16.8958559                 |
| EBV-mir-BART3                  | 17.58748896          | < 1e-07             | < 1e-07   | < 1e-07             | 0.9132633                 | 16.0620225                 |
| EBV-miR-BART10                 | 14.69989431          | < 1e-07             | < 1e-07   | < 1e-07             | 1.1458645                 | 16.8440805                 |
| EBV-mir-BART8                  | 9.488377212          | < 1e-07             | < 1e-07   | < 1e-07             | 1.1705958                 | 11.1070561                 |
| EBV-mir-BART9                  | 8.929823198          | < 1e-07             | < 1e-07   | < 1e-07             | 1.0091342                 | 9.0113889                  |
| EBV-mir-BART5                  | 7.846405052          | < 1e-07             | < 1e-07   | < 1e-07             | 0.9187861                 | 7.2091699                  |
| EBV-mir-BART6                  | 7.118709463          | 1.00E-07            | 7.40E-06  | < 1e-07             | 0.7954561                 | 5.6626205                  |
| EBV-miR-BART2                  | 6.916700789          | < 1e-07             | < 1e-07   | < 1e-07             | 1.3506757                 | 9.3422202                  |
| EBV-mir-BART14                 | 4.411855538          | 3.00E-07            | 1.92E-05  | < 1e-07             | 1.2572036                 | 5.5466018                  |
| EBV-mir-BART16                 | 3.987080265          | 2.50E-06            | 0.0001412 | < 1e-07             | 1.0048799                 | 4.0065376                  |
| hcmv-miR-UL22A-1               | 3.885736046          | < 1e-07             | < 1e-07   | < 1e-07             | 0.7876988                 | 3.0607896                  |
| EBV-mir-BART4                  | 3.787084074          | 7.00E-07            | 4.20E-05  | < 1e-07             | 0.9391749                 | 3.5567349                  |
| hsa-mir-643                    | 3.265885184          | 0.0004774           | 0.0100596 | 4.00E-04            | 0.7455299                 | 2.4348153                  |
| hsa-miR-205                    | 3.248118933          | 6.92E-05            | 0.002076  | 3.00E-04            | 6.728439                  | 21.8547711                 |
| hsa-mir-660                    | 3.147664166          | 0.0002148           | 0.0054265 | 7.00E-04            | 1.6899949                 | 5.3195365                  |
| hsa-mir-651                    | 2.851257861          | 5.44E-05            | 0.0018651 | 4.00E-04            | 0.8795513                 | 2.5078271                  |
| EBV-mir-BART12                 | 2.823659898          | 2.38E-05            | 0.000952  | < 1e-07             | 0.8353809                 | 2.3588313                  |
| hsa-mir-613                    | 2.792151931          | 5.84E-05            | 0.0019264 | 3.00E-04            | 0.7482905                 | 2.0893406                  |
| hsa-mir-581                    | 2.696646908          | 0.00028             | 0.0064    | 8.00E-04            | 1.0545058                 | 2.8436301                  |
| EBV-mir-BART17                 | 2.290131754          | 0.0025353           | 0.0325018 | 0.0043              | 1.2044927                 | 2.7584471                  |
| EBV-mir-BART20                 | 1.963470804          | 0.001917            | 0.0259484 | 0.002               | 1.0313375                 | 2.025001                   |
| hcmv-miR-US25-2-5p             | 1.751267173          | 0.0004925           | 0.0100596 | 5.00E-04            | 0.7969985                 | 1.3957573                  |
| hsa-mir-604                    | 1.707947764          | 0.0002276           | 0.0055488 | 3.00E-04            | 0.8396544                 | 1.4340858                  |
| hsa-miR-191                    | 0.675653489          | 0.0024665           | 0.0324362 | 0.0012              | 1.2266716                 | 0.8288049                  |
| hsa-miR-199a                   | 0.667823292          | 0.0016459           | 0.0232362 | 0.001               | 1.0138932                 | 0.6771015                  |
| <a href="#">hsa-let-7i</a>     | 0.624801665          | 0.0032592           | 0.0391692 | 5.00E-04            | 1.6666703                 | 1.0413384                  |
| <a href="#">hsa-miR-26a</a>    | 0.583824466          | 0.002897            | 0.0361184 | 0.0014              | 3.2261411                 | 1.8835                     |
| <a href="#">hsa-let-7c</a>     | 0.573459207          | 0.0009439           | 0.0158973 | 5.00E-04            | 0.9209456                 | 0.5281247                  |
| hsa-miR-221                    | 0.563403611          | 0.0019191           | 0.0259484 | 0.0022              | 0.956716                  | 0.5390172                  |
| <a href="#">hsa-let-7d</a>     | 0.562094115          | 0.0014468           | 0.021702  | 0.0012              | 0.9135164                 | 0.5134822                  |
| hsa-miR-375                    | 0.553670369          | 0.0028318           | 0.0357701 | 0.0026              | 1.056692                  | 0.585059                   |
| hsa-miR-136                    | 0.55210868           | 0.0013857           | 0.0211154 | 0.0016              | 1.8847563                 | 1.0405903                  |
| hsa-miR-10b                    | 0.548276244          | 0.0007865           | 0.014246  | 0.0012              | 0.5592348                 | 0.3066151                  |
| hsa-miR-199b                   | 0.536033283          | 0.001025            | 0.0169655 | 0.0017              | 1.8175629                 | 0.9742742                  |
| <a href="#">hsa-miR-30a-5p</a> | 0.520525329          | 2.35E-05            | 0.000952  | < 1e-07             | 4.7382753                 | 2.4663923                  |
| <a href="#">hsa-miR-30d</a>    | 0.520322198          | 0.0002312           | 0.0055488 | < 1e-07             | 4.3641825                 | 2.2707811                  |
| <a href="#">hsa-miR-152</a>    | 0.51214102           | 0.0005287           | 0.010574  | 6.00E-04            | 2.6944112                 | 1.3799185                  |
| <a href="#">hsa-miR-145</a>    | 0.500895953          | 0.0043537           | 0.0491712 | 0.0062              | 17.6262937                | 8.8289392                  |

|                                |             |           |           |          |            |            |
|--------------------------------|-------------|-----------|-----------|----------|------------|------------|
| hsa-mir-624                    | 0.48726506  | 0.0032641 | 0.0391692 | 0.0032   | 1.3162108  | 0.6413435  |
| hsa-miR-365                    | 0.485030362 | 0.0016908 | 0.0235242 | 0.0028   | 0.8250951  | 0.4001962  |
| <a href="#">hsa-let-7g</a>     | 0.480341011 | 0.0004898 | 0.0100596 | < 1e-07  | 1.7995287  | 0.8643874  |
| <a href="#">hsa-miR-31</a>     | 0.477838587 | 0.0006132 | 0.0115426 | 6.00E-04 | 0.4731818  | 0.2261045  |
| hsa-miR-199a*                  | 0.473994909 | 0.0036812 | 0.0425777 | 0.0051   | 2.6174524  | 1.2406591  |
| hsa-miR-196b                   | 0.471017271 | 0.003782  | 0.0432229 | 0.0063   | 1.5101803  | 0.711321   |
| <a href="#">hsa-miR-30e-5p</a> | 0.458486626 | 2.80E-06  | 0.0001493 | < 1e-07  | 6.0942278  | 2.7941219  |
| <a href="#">hsa-miR-195</a>    | 0.447332403 | 0.0008874 | 0.0154892 | 0.0015   | 1.99611    | 0.8929247  |
| <a href="#">hsa-miR-29a</a>    | 0.437574812 | 2.33E-05  | 0.000952  | < 1e-07  | 4.1010735  | 1.7945265  |
| <a href="#">hsa-miR-16</a>     | 0.435157393 | 0.0045243 | 0.0505038 | 0.0051   | 1.8793853  | 0.8178284  |
| <a href="#">hsa-miR-29b</a>    | 0.431569238 | 0.0001835 | 0.0047611 | 1.00E-04 | 1.7628566  | 0.7607947  |
| hsa-miR-346                    | 0.42473145  | 0.0005502 | 0.0107794 | 0.0016   | 4.9578175  | 2.1057411  |
| <a href="#">hsa-miR-146a</a>   | 0.418978959 | 2.77E-05  | 0.0010228 | < 1e-07  | 10.756221  | 4.5066303  |
| <a href="#">hsa-miR-30b</a>    | 0.406976952 | 0.0003932 | 0.0085789 | 2.00E-04 | 4.5581951  | 1.8550803  |
| hsa-miR-342                    | 0.397489125 | 2.77E-05  | 0.0010228 | < 1e-07  | 8.6870346  | 3.4530018  |
| hsa-miR-449                    | 0.396329922 | 0.0035867 | 0.0419906 | 0.0079   | 6.6484496  | 2.6349795  |
| <a href="#">hsa-miR-143</a>    | 0.379372457 | 0.000574  | 0.0110208 | 8.00E-04 | 43.9659697 | 16.6794781 |
| hsa-miR-144                    | 0.37808031  | 0.0006346 | 0.0117157 | 0.0014   | 47.9652601 | 18.1347207 |
| <a href="#">hsa-miR-29c</a>    | 0.36916765  | 8.40E-06  | 0.0004244 | < 1e-07  | 4.5125747  | 1.6658966  |
| hsa-miR-126*                   | 0.362801182 | 0.000942  | 0.0158973 | 0.0028   | 9.3399427  | 3.3885423  |
| hsa-miR-140                    | 0.331890429 | 0.0008268 | 0.0146987 | 0.0017   | 2.2027896  | 0.7310848  |
| <a href="#">hsa-miR-30a-3p</a> | 0.322618985 | 2.15E-05  | 0.000952  | < 1e-07  | 4.5292535  | 1.4612231  |
| hsa-miR-485-3p                 | 0.317850375 | 0.0011268 | 0.0180288 | 0.0021   | 13.4029323 | 4.2601271  |
| <a href="#">hsa-miR-26b</a>    | 0.312392088 | 4.29E-05  | 0.0015253 | < 1e-07  | 4.4792998  | 1.3992978  |
| hsa-miR-105                    | 0.304738919 | 0.0001367 | 0.0037495 | 6.00E-04 | 2.615638   | 0.7970867  |
| hsa-miR-32                     | 0.282737728 | 0.0021969 | 0.029292  | 0.0049   | 2.6416395  | 0.7468911  |
| <a href="#">hsa-miR-101</a>    | 0.26323514  | 8.98E-05  | 0.0025355 | 3.00E-04 | 2.5906225  | 0.6819429  |
| <a href="#">hsa-miR-150</a>    | 0.253107259 | 6.02E-05  | 0.0019264 | 3.00E-04 | 20.454355  | 5.1771457  |
| <a href="#">hsa-miR-34b</a>    | 0.173349588 | 3.00E-07  | 1.92E-05  | < 1e-07  | 3.0396284  | 0.5269183  |
| <a href="#">hsa-miR-34c</a>    | 0.126005664 | < 1e-07   | < 1e-07   | < 1e-07  | 1.614109   | 0.2033869  |

**Notes:**

Normalization: Normalize (center) each array using lowess smoother.

Exclude a gene under any of the following conditions: <20% of expression data have  $\geq 1.5$ -fold change in either direction from gene's median value. Percent of data missing or filtered out exceeds 50%.

\*Global test: probability of getting at least 69 genes significant by chance (at the 0.005 level).

FDR, False discovery rate.

Tumor suppressor miRNAs are highlighted with colors.

**Supplementary Table 3.** A cohort of clinical samples used for the association analysis with pathological and clinical data

|              | Clinical tissue samples |             | P-value            |
|--------------|-------------------------|-------------|--------------------|
|              | NP (n=32)               | NPC (n=82)  |                    |
| Age, years   | 43.18                   | 54.65       | 0.076*             |
| Gender, male | 18 (65.63%)             | 54 (65.85%) | 0.390 <sup>§</sup> |
| T stage      |                         |             |                    |
| T1           |                         | 18 (21.95%) |                    |
| T2           |                         | 22 (26.83%) |                    |
| T3           |                         | 20 (24.39%) |                    |
| T4           |                         | 22 (26.83%) |                    |
| N stage      |                         |             |                    |
| N0           |                         | 7 (8.54%)   |                    |
| N1           |                         | 26 (31.71%) |                    |
| N2           |                         | 33 (40.24%) |                    |
| N3           |                         | 16 (19.51%) |                    |
| M stage      |                         |             |                    |
| M0           |                         | 77 (93.90%) |                    |
| M1           |                         | 5 (6.10%)   |                    |
| M2           |                         | 0           |                    |
| M3           |                         | 0           |                    |
| TNM stage    |                         |             |                    |
| I            |                         | 15 (18.29%) |                    |
| II           |                         | 22 (26.83%) |                    |
| III          |                         | 25 (30.49%) |                    |
| IV           |                         | 20 (24.39%) |                    |

\*Independent t test. <sup>§</sup>Chi-square test.

**Supplementary Table 4.** Candidate genes and their associated pathways

| Gene symbol | Fold-change | P-value  | Pathways* |
|-------------|-------------|----------|-----------|
| PTEN        | 0.422484    | 8.35E-18 | <b>5</b>  |
| NRAS        | 0.470386    | 6.71E-23 | 2         |
| CHUK        | 0.411017    | 1.31E-07 | 3         |
| SOS2        | 0.495144    | 7.63E-11 | 3         |
| CYCS        | 0.415773    | 1.51E-51 | 3         |
| BAX         | 0.433427    | 0.000129 | 1         |
| TNFRSF10D   | 0.257243    | 1.05E-06 | 1         |
| CDK1        | 0.33074     | 8.87E-09 | 1         |
| ROCK1       | 0.408148    | 6.83E-13 | 1         |
| ATR         | 0.34964     | 4.08E-23 | 1         |
| SERPINB5    | 0.418178    | 4.31E-35 | 1         |
| HSP90AA1    | 0.081898    | 5.94E-32 | 2         |
| BIRC3       | 0.227606    | 3.61E-05 | 3         |
| BIRC2       | 0.234874    | 1.05E-23 | 3         |
| MGST2       | 0.260917    | 1.02E-27 | 2         |
| EGLN3       | 0.26978     | 2.00E-28 | 1         |
| MSH2        | 0.336967    | 6.10E-26 | 1         |
| CUL2        | 0.403895    | 4.71E-08 | 1         |
| SP100       | 0.372665    | 2.11E-06 | 1         |
| TPR         | 0.446203    | 1.88E-40 | 1         |
| CCNA2       | 0.457381    | 9.58E-28 | 1         |
| MYLK3       | 0.220494    | 1.84E-06 | 1         |
| PPP1CC      | 0.462373    | 9.43E-79 | 1         |

\*Metastasis/invasion-associated pathways in which candidate genes were involved. These pathways are p53 signaling pathway, pathway in cancer, prostate cancer, focal adhesion and small cell lung cancer.



**Supplementary Table 5. Primer sequences**

| Gene              | Primer  | Sequence                         |
|-------------------|---------|----------------------------------|
| PTEN              | Forward | 5'-TGCAGAAGAAGCCCCGCCA-3'        |
|                   | Reverse | 5'-ACGCCTTCAAGTCTTTCTGCAGG-3'    |
| mut1*             | Forward | 5'-AACGCAAGGTTTCCGAAGGGTTTTGC-3' |
|                   | Reverse | 5'-CAACTGCAAACCTTATCTGTTGCCAC-3' |
| mut2 <sup>§</sup> | Forward | 5'-CGAAGAAAATTCAGATGCTGTTAG-3'   |
|                   | Reverse | 5'-TGGCCTTGATTACACTGGAGATGG-3'   |
| GAPDH             | Forward | 5'-GCCACATCGCTCAGACACCA-3'       |
|                   | Reverse | 5'-CTCAGCCTTGACGGTGCCAT-3'       |

\*Mut1, PTEN 3'-UTR containing mutant EBV-miR-BART1-5p binding site;

§Mut2, PTEN 3'-UTR containing mutant EBV-miR-BART1-3p binding site

**Supplementary Table 6. A list of antibodies used for Western blotting and IHC staining**

| Name of antibody               | Cat. No | Company   | Mol weight | Dilution (WB/IHC) |
|--------------------------------|---------|-----------|------------|-------------------|
| PTEN (D375) pAb                | BS1305  | Bioworld  | 54kDa      | 1:800/1:200       |
| FAK phospho (pY576)            | 2103-1  | Epitomics | 125kDa     | 1:5000            |
| Anti-FAK antibody              | BM0503  | ABZOOM    | 119kDa     | 1:1000            |
| Anti-ERK1/2 antibody           | BM0431  | ABZOOM    | 43kDa      | 1:1000            |
| pErk1 (pT202)/Erk2 (pT185)     | 1481-1  | Epitomics | 42/44kDa   | 1:3000/1:100      |
| p-Shc (Tyr239/240)             | 2434    | CST       | 52kDa      | 1:800/1:200       |
| p-Paxillin (Y31) pAb           | BS4721  | Bioworld  | 68kDa      | 1:800             |
| H/K/N-Ras (H27) pAb            | BS1309  | Bioworld  | 25kDa      | 1:800/1:200       |
| p130 <sup>Cas</sup> (v404) pAb | BS1416  | Bioworld  | 130kDa     | 1:800/1:200       |
| Anti-AKT (p-Ser473)            | AM1006  | ABZOOM    | 60kDa      | 1:1000/1:200      |
| E-cadherin (24E10) mAb         | 3195    | CST       | 135kDa     | 1:500/1:100       |
| N-Cadherin (C-term)            | 2019-1  | Epitomics | 140kDa     | 1:1000            |
| Vimentin                       | BS1776  | Bioworld  | 57kDa      | 1:500/1:100       |
| GAPDH                          | P30008  | Abmart    | 37kDa      | 1:1000            |
